# Supplementary material
Source: publisher figshare collection journal article supplement (https://tandf.figshare.com/ndownloader/files/12808127)
Supplement: Supplementary file 1 [file 12808127]

## Sheet: Supplementary Table
Supplementary Table 1. Collection information of paratypes of freshwater snails from the collection of Rolf A.M. Brandt in the Mollusk Museum, Faculty of Tropical Medicine, Mahidol University, and accession numbers of the holotypes and locations of other paratypes outside of Thailand. Abbreviations: ASRCT—uncertain abbreviation, but presumably refers to the Thailand Institute of Technological and…
Family	Species	Information from original label and TMMU catalogue					Type locality	Approximate present-day location of type locality				Holotype accession no. (SMF)	Location of other paratypes
		Accession no. (original, current)	Collector	Date collected	No. of specimens	Locality		Locality in English	Locality in local language	Latitude	Longitude
Hydrobidae	Rehderiella siamensis Brandt, 1974	SMRL 3395, TMMU 111	—	11 Nov.1966	4	Thailand, Klong Bang O in Thonburi	Klong Bang O in Thonburi	Bang Ao Canal, Bang Na Subdistrict, Bang Na District, Bangkok, Thailand	คลองบางอ้อ, แขวงบางนา, เขตบางนา, กรุงเทพมหานคร, ประเทศไทย	13°40'48.6"N	100°35'56.8"E	SMRL3395/A, SMF198283	SMF, USNM, ZMH
Pomatiopsidae	Hubendickia cingulata Brandt, 1974	SMRL 5100, TMMU 68	—	26 Apr.1969	6	Thailand, Ubon Ratchathani, Mekong at Bandan	Mekong at Bandan	Mekong River, Khong Chiam District, Ubon Ratchathani Province, Thailand	แม่น้ำโขง, อ. โขงเจียม, จ. อุบลราชธานี, ประเทศไทย	15°19'17.9"N	105°29'39.0"E	SMRL3901/A, SMF197376
	Hubendickia cylindrica Brandt, 1974	SMRL 5099, TMMU 74	—	15 Feb.1970	5	Thailand, Ubon Ratchathani, Mekong at Bandan	Mekong at Bandan	Mekong River, Khong Chiam District, Ubon Ratchathani Province, Thailand	แม่น้ำโขง, อ. โขงเจียม, จ. อุบลราชธานี, ประเทศไทย	15°19'17.9"N	105°29'39.0"E	SMRL 599/A, SMF197375	MZSP
	Hubendickia gochenouri Brandt, 1968	SMRL 3385, TMMU 75	—	15 Feb.1970	6	Thailand, Ubon Ratchathani, Mekong River at Ban Khum	Mekong at Ban Kum, Thailand	Mekong River, Kum Village, Huai Phai Subdistrict, Khong Chiam District, Ubon Ratchathani Province, Thailand	แม่น้ำโขง, บ้านกุ่ม, ต. ห้วยไผ่, อ. โขงเจียม, จ. อุบลราชธานี, ประเทศไทย	15°23'22.6"N	105°29'46.4"E	SMRL491/A, SMF197379	SMF, USNM, MZSP*
	Hubendickia microsculpta Brandt, 1968	SMRL 3378 , TMMU 85	—	9 May.1967	13	Thailand, Ubon Ratchathani, Pibun Mangsahan, Mekong at Bandan	Mekong at Bandan	Mekong River, Khong Chiam District, Ubon Ratchathani Province, Thailand	แม่น้ำโขง, อ. โขงเจียม, จ. อุบลราชธานี, ประเทศไทย	15°19'17.9"N	105°29'39.0"E	SMRL492/A, SMF197380	SMF, USNM, ZMH, MZSP
	Hubendickia rolfbrandti Temcharoen, 1971	SMRL 16076, TMMU 2000	R.A.M. Brandt	29 Feb.1969	20	Laos, Mekong at Muang Khong, Wat Khong Island, Sithandone Province	Mekong at Muang Khong (near Wat), Laos	Mekong River, Khong District, Champasak Province, Laos	ແມ່ນໍ້າຂອງ, ເມືອງໂຂງ, ແຂວງ ຈຳປາສັກ, ລາວ	14°07'01.1"N	105°51'21.1"E	SMRL3888/A, SMF215966	MZSP
	Hubendickia siamensis Brandt, 1968	SMRL 3390, TMMU 77	—	20 Feb.1966	121	Thailand, Mun River at Pibun Mangsahan; Ubon	Maenam Mun at Pibun Mangsahan, Thailand	Mun River, Phibun Mangsahan District, Ubon Ratchathani Province, Thailand	แม่น้ำมูล, อ. พิบูลมังสาหาร, จ. อุบลราชธานี, ประเทศไทย	15°14'47.6"N	105°14'36.9"E	SMRL5100/A, SMF198289	SMF, THRC, USNM, ZMH, MZSP
	Hubendickia spiralis Brandt, 1968	SMRL 3386, TMMU 78	—	9 May.1967	48	Mekong river at Bandan, Ubon Province	Mekong river at Bandan, Ubon Province, East Thailand	Mekong River, Khong Chiam District, Ubon Ratchathani Province, Thailand	แม่น้ำโขง, อ. โขงเจียม, จ. อุบลราชธานี, ประเทศไทย	15°19'17.9"N	105°29'39.0"E	SMRL5099/A, SMF198292	SMF, USNM, ZMH
	Hydrorissoia munensis Brandt, 1968	SMRL 3471, TMMU 94	—	21 Feb.1966	22	Thailand, Mun River at Pibun, Ubon Province	Mun at Pibun Mangsahan, Ubon Province	Mun River, Phibun Mangsahan District, Ubon Ratchathani Province, Thailand	แม่น้ำมูล, อ. พิบูลมังสาหาร, จ. อุบลราชธานี, ประเทศไทย	15°14'47.6"N	105°14'36.9"E	SMRL3385/A, SMF197162	SMF, USNM, ZMH, MZSP*
	Hydrorissoia trispiralis Brandt, 1968	SMRL 3472, TMMU 95	—	8 May.1967	535	Mekong at Bandan, Ubon	Mekong river at Bandan, Ubon Province	Mekong River, Khong Chiam District, Ubon Ratchathani Province, Thailand	แม่น้ำโขง, อ. โขงเจียม, จ. อุบลราชธานี, ประเทศไทย	15°19'17.9"N	105°29'39.0"E	SMRL3378/A, SMF197166	SMF, USNM, ZMH
	Jullienia munensis Brandt, 1974	SMRL 3461, TMMU 58	—	20 Feb.1966	14	Thailand, Mun River at Pibun, Ubon	Rapids of the Mun River near Pibun Mangsahan	Saphue Rapids, Mun River, Phibun Subdistrict, Phibun Mangsahan District, Ubon Ratchathani Province, Thailand	แก่งสะพือ, แม่น้ำมูล, ต. พิบูล, อ. พิบูลมังสาหาร, จ. อุบลราชธานี, ประเทศไทย	15°14'47.6"N	105°14'36.9"E	SMRL16076/A	MZSP*
	Lacunopsis conica Brandt, 1968	SMRL 16216, TMMU 2007	R.A.M. Brandt	23 Feb.1969	20	Laos, Sithandone Province, Mekong branch at Somphamit Falls	Mekong branch, at the rapids 2 km south of Khone, South Laos	Som Pha Mit (Lii Phii) Falls, Khong District, Champasak Province, Laos	ນໍ້າຕົກສົມພະມິດ (ຫລີຜີ), ເມືອງໂຂງ, ແຂວງ ຈຳປາສັກ, ລາວ	13°57'17.8"N	105°54'50.4"E	SMRL3390/A, SMF197168	MZSP
	Lacunopsis fischerpiettei Brandt, 1968	SMRL 3467, TMMU 101	—	21 Mar.1967	4	Thailand, Ubon Ratchathani, Mekong at Bandan	Mekong at Bandan, East Thailand	Mekong River, Khong Chiam District, Ubon Ratchathani Province, Thailand	แม่น้ำโขง, อ. โขงเจียม, จ. อุบลราชธานี, ประเทศไทย	15°19'17.9"N	105°29'39.0"E	SMRL3386/A, SMF197172
	Lacunopsis munensis Brandt, 1968	SMRL 3371, TMMU 105	—	20 Feb.1966	7	Mun River, Ubon	Mun river at Ubon Ratchathani	Mun River, Ubon Ratchathani Province, Thailand	แม่น้ำมูล, จ. อุบลราชธานี, ประเทศไทย	15°13'21.2"N	104°51'27.5"E	SMRL3471/A, SMF197176	SMF, USNM, ZMH
	Manningiella polita Brandt, 1970	SMRL 3377, TMMU 86	—	28 Apr.1969	80	Thailand, Mekong at Bandan, Pibun District, Ubon Province	Mekong at Bandan, East Thailand	Mekong River, Khong Chiam District, Ubon Ratchathani Province, Thailand	แม่น้ำโขง, อ. โขงเจียม, จ. อุบลราชธานี, ประเทศไทย	15°19'17.9"N	105°29'39.0"E	SMRL3472/A, SMF197178	MZSP^
	Manningiella rolfbrandti Temcharoen, 1971	SMRL 16287, TMMU81	—	23 Feb.1969	6	Laos, Mekong at Muang Khong Island, Sithandone Province	Mekong at Muang Khong near Wat, Laos	Mekong River, Khong District, Champasak Province, Laos	ແມ່ນໍ້າຂອງ, ເມືອງໂຂງ, ແຂວງ ຈຳປາສັກ, ລາວ	14°07'01.1"N	105°51'21.1"E	SMRL3461/A, SMF219033a	MZSP
	Pachydrobia prasongi Brandt, 1974	SMRL 3432, TMMU 46	—	19 Feb.1966	5	Se Bang Fai river opposite Tat Panom, Laos	Se Bang Fai River in Laos near Ban Tha Deua, opposite Tat Panom	Xe Bang Fai River, Xaybuly District, Savannakhet Province, Laos	ເຊບັ້ງໄຟ, ເມືອງໄຊບູລີ, ແຂວງ ສະຫວັນນະເຂດ, ລາວ	16°56'04.2"N	104°45'08.5"E	SMRL16216/A
	Pachydrobia siamensis Brandt, 1968	SMRL 446, TMMU 48	—	23 Jun.1963	5	Maenam Kwae Noi at Ban Kao Pun, Kanchanaburi	Maenam Kwae Noi at Ban Kao Pun, north of Kanchanaburi	Khwae Noi River, Khao Pun Village, Tha Ma Kham Subdistrict, Mueang District, Kanchanaburi Province, Thailand	แม่น้ำแควน้อย, บ้านเขาปูน, ต. ท่ามะขาม, อ. เมืองกาญจนบุรี, ประเทศไทย	13°59'59.3"N	99°30'38.6"E	SMRL3467/A, SMF197310	SMF, ASRCT, USNM, ZMH
	Pachydrobia wykoffi Brandt, 1968	SMRL 3433, TMMU 51	—	18 Feb.1966	10	—	Mekong river, sand-bank 2 km S. of Nakon Panom	Mekong River, Tha Kho Subdistrict, Mueang District, Nakhon Phanom Province, Thailand	แม่น้ำโขง,ต. ท่าค้อ, อ. เมืองนครพนม, จ. นครพนม, ประเทศไทย	17°21'48.5"N	104°47'52.7"E	SMRL3371/A, SMF197311	SMF, USNM, ZMH
	Pachydrobia zilchi Brandt, 1968	SMRL 460, TMMU 53	—	7 May.1964	12	Maenam Mun at Ubon Ratchatani Bridge, Thailand	Mun river at Ubon Ratchathani, East Thailand	Mun River, Nai Mueang Subdistrict, Mueang District, Ubon Ratchathani, Thailand	แม่น้ำมูล, ต. ในเมือง, อ. เมืองอุบลราชธานี, จ. อุบลราชธานี, ประเทศไทย	15°13'21.2"N	104°51'27.5"E	SMRL3377/A, SMF197216	SMF, USNM, ZMH
	Paraprososthenia brandti Temcharoen, 1971	SMRL 16109, TMMU60	—	24 Feb.1968	6	Laos, Pakse, Sedone River at Khong Sedon, North of Pakse	Sedone river at Khong Sedone, N. of Pakse in Laos	Xe Don River, Khongxedon District, Saravane Province, Laos	ເຊໂດນ, ເມືອງຄົງເຊໂດນ, ແຂວງ ສາລະວັນ, ລາວ	15°34'43.6"N	105°48'43.3"E	SMRL16287/A	SMF, USNM, ZMH, collection ‘of the author (P. Temcharoen)’, MZSP
	Paraprososthenia davisi Brandt, 1968	SMRL 3384 , TMMU 61	—	9 May.1967	6	Thailand, Ubon Ratchathani, Mekong River at Bandan	Mekong river at Bandan in East Thailand	Mekong River, Khong Chiam District, Ubon Ratchathani Province, Thailand	แม่น้ำโขง, อ. โขงเจียม, จ. อุบลราชธานี, ประเทศไทย	15°19'17.9"N	105°29'39.0"E	SMRL3432/A, SMF198285
	Paraprososthenia fischerpiettei Brandt, 1970	SMRL 16301, TMMU63	—	6 Apr.1969	7	Cambodia, Kratie, Mekong River at Sambor, north of Kratie	Mekong river at Sambor (Cambodia)	Mekong River, Sambour District, Kratie Province, Cambodia	ទន្លេមេគង្គ ស្រុកសំបូរ ខេត្តក្រចេះ ប្រទេសកម្ពុជា	12°46'22.1"N	105°57'47.5"E	SMRL446/A, SMF197190	MZSP^
	Paraprososthenia vivonai Brandt, 1968	SMRL 3443, TMMU 67	Temchareon	24 Apr.1969	7	Mekong at Bandan , Ubon	Mekong river at Bandan in East Thailand	Mekong River, Khong Chiam District, Ubon Ratchathani Province, Thailand	แม่น้ำโขง, อ. โขงเจียม, จ. อุบลราชธานี, ประเทศไทย	15°19'17.9"N	105°29'39.0"E	SMRL3433/A, SMF197159
	Wykoffia crooki Brandt, 1968	SMRL 3463, TMMU 56	—	22 Mar.1967	5	Thailand, Ubon Ratchathani, Mekong River at Bandan	Mekong river at Bandan in East Thailand	Mekong River, Khong Chiam District, Ubon Ratchathani Province, Thailand	แม่น้ำโขง, อ. โขงเจียม, จ. อุบลราชธานี, ประเทศไทย	15°19'17.9"N	105°29'39.0"E	SMRL460/A, SMF197192	SMF, USNM, MZSP
Stenothyridae	Gangetia tigertti Brandt, 1968	SMRL 4031, TMMU 239	—	26 Nov.1967	39	Thailand: Ban Don Makok, East of Glaeng; Rayong Province	Trench along the road at Ban Don Makok, Glaeng Destrict [sic], Rayong Province	Don Makok Village, Thang Kwian Subdistrict, Klaeng District, Rayong Province, Thailand	บ้านดอนมะกอก, ต. ทางเกวียน, อ. แกลง, จ. ระยอง, ประเทศไทย	12°47'07.3"N	101°40'46.6"E	SMRL16109/A	SMF, USNM, ZMH
	Stenothyra basisculpta Brandt, 1970	SMRL 5045, TMMU 215	—	26 Apr.1969	21	Thailand, Ubon Province, Phibun District, Mekong at Bandan	Mekong at Bandan, Ubon Province	Mekong River, Khong Chiam Subdistrict, Khong Chiam District, Ubon Ratchathani Province, Thailand	แม่น้ำโขง, ต. โขงเจียม, อ. โขงเจียม, จ. อุบลราชธานี, ประเทศไทย	15°19'17.9"N	105°29'39.0"E	SMRL3384/A, SMF197154
	Stenothyra fasciata Brandt, 1968	SMRL 4046, TMMU 219	—	16 Feb.1966	25	Thailand, Maenam Songkram, Wannonivet	Maenam Songkram at Wanonivat, Sakon Nakon	Songkhram River, Kham Ta Kla District, Sakon Nakhon Province, Thailand	แม่น้ำสงคราม, อ. คำตากล้า, จ. สกลนคร, ประเทศไทย	17°51'56.6"N	103°46'26.8"E	SMRL16301/A	SMF, USNM, ZMH
	Stenothyra jiraponi Brandt, 1968	SMRL 3417, TMMU 223	—	—	10	Thailand, Maenam Songkram Wannonivet	Maenam Songkram, north of Wanoniwat, Province of Sakon Nakon	Songkhram River, Kham Ta Kla District, Sakon Nakhon Province, Thailand	แม่น้ำสงคราม, อ. คำตากล้า, จ. สกลนคร, ประเทศไทย	17°51'56.6"N	103°46'26.8"E	SMRL3443/A, SMF197159
	Stenothyra microsculpta Brandt, 1974	SMRL 5037, TMMU 232	—	—	7	Thailand, Nakhon Phanom, Huai Tuay near Tha Uthen	Huai Tuay near Tha Uthen, Nakon Panom Province, in the N.E. of Thailand	Thuai Creek, Kusuman District, Sakon Nakhon Province, Thailand	ห้วยทวย, อ. กุสุมาลย์, จ. สกลนคร, ประเทศไทย	17°21'10.1"N	104°21'16.9"E	SMRL3463, SMF197193
	Stenothyra roseni Brandt, 1968	SMRL 4994, TMMU 235	Brandt	—	3	Thailand, Maenam Sonkram, N. of Wannonivet	Maenam Songkram N of Wanoniwat, Province of Nakon Panom	Songkhram River, Na Thom District, Nakhon Phanom Province, Thailand	แม่น้ำสงคราม, อ. นาทม, จ. นครพนม, ประเทศไทย	17°42'34.3"N	104°04'41.5"E	SMRL4031/A, SMF197315	USNM
	Stenothyra spiralis Brandt, 1968	SMRL 3421, TMMU 236	—	13 Feb.1966	9	Mun river at Rasi Salai, Sri Saket, Thailand	Mun river at Rasi Salai, Province of Sri Saket, East Thailand	Mun River, Rasi Salai District, Si Sa Ket Province, Thailand	แม่น้ำมูล, อ. ราษีไศล, จ. ศรีสะเกษ, ประเทศไทย	15°20'22.1"N	104°09'12.8"E	SMRL5045/A, SMF197233
	Stenothyra wykoffi Brandt, 1968	SMRL 4052, TMMU 238	—	23 Mar.1967	5	Maenam Mun at Rasi Salai; Ubon, Thailand	Maenam Mun at Rasi Salai, Sri Saket	Mun River, Rasi Salai District, Si Sa Ket Province, Thailand	แม่น้ำมูล, อ. ราษีไศล, จ. ศรีสะเกษ, ประเทศไทย	15°20'22.1"N	104°09'12.8"E	SMRL4046/A, SMF197245	SMF, USNM, ZMH
Thiaridae (now Pachychilidae)	Brotia manningi Brandt, 1968	SMRL 3901, TMMU 272	—	14 Feb.1968	1	Thailand, Phetchabun, Huai Lan at Dam Pon, Lom Sak	Huai Lan at Ban Dam Pon, Lom Sak District, Petchabun Province	Huai Lan Village, Nam Chun Subdistrict, Lom Sak District, Phetchabun Province, Thailand	บ้านห้วยลาน,ต. น้ำชุน, อ. หล่มสัก, จ. เพชรบูรณ์, ประเทศไทย	16°42'53.5"N	101°09'46.8"E	SMRL3417/A, SMF197246	SMF, USNM, ZMH, MCZ, RMNH
	Brotia pseudoasperata Brandt, 1968	SMRL 599, TMMU 276	—	16 Jan.1965	5	Nam San, Ban Kaeng Hai, Dan Sai District, Loei Province	Maenam San at Ban Gaeng Hai, Dan Sai District, 65km west of Loei	San Canal, Kaeng Hai Village, Nong Bua Subdistrict, Phu Ruea District, Loei Province, Thailand	ลำน้ำสาน, บ้านแก่งไฮ, ต. หนองบัว, อ. ภูเรือ, จ. เลย, ประเทศไทย	17°26'25.5"N	101°19'37.9"E	SMRL5037/A, SMF198281	SMF, MCZ, NHMUK, RMNH, USNM, ZMH, ZSM
	Brotia pseudosulcospira Brandt, 1968	SMRL 491, TMMU 277	—	12 Dec.1967	18	Kaew Noi River at Wang Nok Nang Aen, E. of Phitsanulok	Maenam Kaek in Pitsanulok Province, at Wang Nok Nang Aen, Wang Tong District, Thailand	Khek River, Wang Nok Aen Subdistrict, Wang Thong District, Phitsanulok Province, Thailand	แม่น้ำเข็ก, ต. วังนกแอ่น, อ. วังทอง, จ. พิษณุโลก, ประเทศไทย	16°52'32.8"N	100°38'28.1"E	SMRL4994/A, SMF197265	SMF, NHMUK, USNM, ZMH
	Brotia pseudosulcospira armata Brandt, 1968	SMRL 492, TMMU 278	—	13 Dec.1967	24	Kaek Noi River at Glaeng Song, Phitsanulok	Maenam Kaek in Pitsanulok Province at Gaeng Song (rapids), 60km east of Pitsanulok	Kaeng Song Waterfall, Khek River, Kaeng Sopha Subdistrict, Wang Thong District, Phitsanulok Province, Thailand	น้ำตกแก่งซอง, แม่น้ำเข็ก, ต. วังนกแอ่น, อ. วังทอง, จ. พิษณุโลก, ประเทศไทย	16°52'00.5"N	100°37'54.9"E	SMRL3421/A, SMF197267	SMF, NHMUK, RMNH, USNM, ZMH
	Paracrostoma morrisoni Brandt, 1974	SMRL 3888, TMMU 274	—	17 Dec.1967	4	Thailand, Kaek River at Sopa falls, 71 km E of Pitsanulok	Maenam Kaek at Sopa Falls, 71 km E. of Pitsanulok	Kaeng Sopha Waterfall, Khek River, Ban Yaeng Subdistrict, Nakhon Thai District, Phitsanulok Province, Thailand	น้ำตกแก่งโสภา, แม่น้ำเข็ก, ต. บ้านแยง,อ. นครไทย, จ. พิษณุโลก, ประเทศไทย	16°52'18.0"N	100°50'05.6"E	SMRL4052/A, SMF197268	SMF, RMNH
Tornidae	Chamlongia harinasutai Brandt, 1968	SMRL 4111, TMMU 243	—	22 Dec.1966	6	Thailand, Rayong, Ban Don Makok, Glaeng	Brackish water trench along the highway between Rayong and Chantaburi, 2 km east of Glaeng, near the bridge of the Klong Don Makok	Don Makok Village, Thang Kwian Subdistrict, Klaeng District, Rayong Province, Thailand	บ้านดอนมะกอก, ต. ทางเกวียน, อ. แกลง, จ. ระยอง, ประเทศไทย	12°47'07.3"N	101°40'46.6"E	SMRL4111/A, SMF197316	SMF, USNM, ZMH
Viviparidae	Cipangopaludina annandalei Brandt, 1968	SMRL 231, TMMU 214	—	1 Oct.1963	12	Thailand, Chiang Rai	Maekok river near Chieng Rai, N-Thailand	Kok River, Mueang District, Chiang Rai Province, Thailand	น้ำแม่กก, อ. เมืองเชียงราย, จ. เชียงราย, ประเทศไทย	19°55'12.1"N	99°50'44.4"E	SMRL231/A, SMF197373	SMF, USNM, ZMH, ‘Brandt collection’
	Mekongia pongensis Brandt, 1968	SMRL 3191, TMMU 167	—	16 Feb.1963	63	Lam Than (Maenam Pao) at Kalasin, Thailand	Lam Than (Maenam Pao) at Kalasin, Thailand	Pao Canal, Mueang District, Kalasin Province, Thailand	ลำน้ำปาว, อ. เมืองกาฬสินธุ์, จ. กาฬสินธุ์, ประเทศไทย	16°32'24.4"N	103°28'19.7"E	SMRL3191/A, SMF197368
	Mekongia sphaericula spriralis Brandt, 1974	SMRL 141, TMMU 166	—	26 Feb.1966	12	Lam Chi River at Selaphum, Tawatburi, Roi Et	Lam Chi River at Selaphum, E. of Roi Ett	Chi River, Khwan Mueang Subdistrict, Selaphum District, Roi Et Province, Thailand	แม่น้ำชี, ต. ขวัญเมือง, อ. เสลภูมิ, จ. ร้อยเอ็ด, ประเทศไทย	16°02'04.0"N	103°54'25.7"E	SMRL141/A, SMF219314
	Mekongia swainsoni flavida Brandt, 1974	SMRL 151, TMMU 171	—	8 Sep.1963	9	Mekong at Ban Nong Saeng, Nakon Panom Province	Mekong at Ban Nong Saeng, 3km N. of Nakon Panom, E. Thailand	Mekong River, Nong Saeng Subdistrict, Mueang District, Nakhon Phanom Province, Thailand	แม่น้ำโขง, ต. หนองแสง, อ. เมืองนครพนม, ประเทศไทย	17°26'23.6"N	104°45'16.9"E	SMRL151/A, SMF198282
	Sinotaia arturrolli Brandt, 1968	SMRL 3125, TMMU 2020	R.A.M. Brandt	—	5	Thailand, Maenam Kham, South of Tat Panom, Nakon Panom Province	Maenam Kham south of Ta Panom, Nakon Panom Province, N.E.-Thailand	Kam Canal, That Phanom District, Nakhon Phanom Province, Thailand	ลำน้ำก่ำ, อ. ธาตุพนม, จ. นครพนม, ประเทศไทย	16°55'12.8"N	104°43'31.4"E	SMRL3125/A, SMF197372	SMF, USNM, ZMH
	Sinotaia mandahlbarthi Brandt, 1968	SMRL 2976, TMMU 187	—	18 Mar.1967	6	Thailand, Nakhon Phanom, Sri Songkram, Huai Mae Un at Sri Songkram	Huai Mae Un, a tributary to the Songkram river near Sri Songkram, Nakon Panom Province, N.E.-Thailand	Un Creek, Si Songkhram District, Nakhon Phanom Province, Thailand	ห้วยน้ำอุน, อ. ศรีสงคราม, จ. นครพนม, ประเทศไทย	17°37'05.5"N	104°14'21.0"E	SMRL2976/A, SMF197371	SMF, USNM, ZMH
^ The collection information of the material in the MZSP (Cavallari et al. 2016) does not match the information of the paratypes as stated in the original descriptions.
* The collection dates of the material in the MZSP (Cavallari et al. 2016) does not match the collection dates of the material from the Mollusk Museum, Faculty of Tropical Medicine, Mahidol University (TMMU).
References
Brandt, R.A.M. (1974) The non-marine aquatic Mollusca of Thailand. Archiv für Molluskenkunde 105, 1–423.
Brandt, R.A.M. (1970) New freshwater gastropods from the Mekong. Archiv für Molluskenkunde 100, 183–205.
Brandt, R.A.M. (1968) Descriptions of new non-marine mollusks from Asia. Archiv für Molluskenkunde 98, 213–289.
Cavallari, D.C., Dornellas, A.P.S. & Simone, L.R.L. (2016) Second annotated list of type specimens of molluscs deposited in the Museu de Zoologia da Universidade de São Paulo, Brazil. European Journal of Taxonomy 213, 1–59.
Köhler, F. & Glaubrecht, M. (2002) Annotated catalogue of the nominal taxa of Southeast Asian freshwater gastropods, family Pachychilidae Troschel, 1857 (Mollusca, Caenogastropoda, Cerithioidea), with an evaluation of the types. Zoosystematics and Evolution 78, 121–156.
Temcharoen, P. (1971) New aquatic molluscs from Laos. Archiv für Molluskenkunde 101, 91–109.
